# Supplementary material for: A novel de novo TBX5 mutation in a patient with Holt–Oram syndrome leading to a dramatically reduced biological function
Source: PubMed Central journal article supplement (PMC5023941; doi:10.1002/mgg3.234), 2016-07-14
Supplement: MGG3-4-557-s001.pdf [file MGG3-4-557-s001.pdf]

**Table S1. List of primers used.**

| <b>target</b>               |         | <b>sequence</b>                |
|-----------------------------|---------|--------------------------------|
| <b>TBX5 Exon 2</b>          | forward | CAC CCC CAT CTC CCC CTG        |
|                             | reverse | GCC GAG CAG GAA AGC CAG A      |
| <b>TBX5 Exon 3</b>          | forward | GTC TCT GTG TTT TGG GGG AG     |
|                             | reverse | CTC TTC CAA GCC ACC TTT TCT    |
| <b>TBX5 Exon 4</b>          | forward | TGG ATG GAG GCT GCC TTA AAA    |
|                             | reverse | GTT CAC TGA TAC AAC TTT TCA AC |
| <b>TBX5 Exon 5</b>          | forward | GGT GCG TGA ACT GAA GCA CG     |
|                             | reverse | GGG AGA GAA ACC CAG TGA GA     |
| <b>TBX5 Exon 5 (nested)</b> | forward | TTC GGT GCA GTG CGC TAC C      |
|                             | reverse | AGA GAG GAC AAG AGG GAG AC     |
| <b>TBX5 Exon 6</b>          | forward | AGC AGG GTT TTA TCT GGA GAC    |
|                             | reverse | CAG CAG GAA AAC CTT GCA GAT    |
| <b>TBX5 Exon 7</b>          | forward | ATT AGC TCA TGT CCT GAG GTG    |
|                             | reverse | GGT TGC TGC TGG CTT ACC TG     |
| <b>TBX5 Exon 8</b>          | forward | CCT GGT TCA GCC ACT CAG G      |
|                             | reverse | TAC TCC TCA CCC CCT CAC C      |
| <b>TBX5 Exon 9</b>          | forward | TAA CTG TCT CCA CTT TTA GCT G  |
|                             | reverse | GGG GTT CTC TTG GCT ACT GT     |
| <b>TBX5 Exon 9 (nested)</b> | forward | CCT GGT GCC TGC TCC TGG        |
|                             | reverse | CTA CTG TCT CTC TCC TTC TCT    |
| <b>b-ACTIN</b>              | forward | CCA ACC GCG AGA AGA TGA        |
|                             | reverse | CCA GAG GCG TAC AGG GAT AG     |
| <b>TBX5</b>                 | forward | TGA TCA TAA CCA AGG CTG GA     |
|                             | reverse | GAT TAA GGC CCG TCA CCT TC     |
| <b>NPPA</b>                 | forward | GAG CGG ACT GGG CTG TAA C      |
|                             | reverse | GGA GCC TCT TGC AGT CTG TC     |
| <b>IRX4</b>                 | forward | CCT CAA GAG CTC CAA GAA CG     |
|                             | reverse | CGA AGT CGT CCA AGT CAC TAA G  |
| <b>CX40</b>                 | forward | CGT GGG CAG TTG GAG AAG        |
|                             | reverse | GGG AAC AGA TGC CAA AAC TT     |
| <b>HEY2</b>                 | forward | CTT GTC GCC TCT CCA CAA CT     |
|                             | reverse | ATT CGG AGG GCT GAA TCC        |
| <b>TNNI3</b>                | forward | GCA GAT GCC ATG ATG CAG        |
|                             | reverse | CAC CTC CCG GTT TTC CTT        |
| <b>ID2</b>                  | forward | ATA TCA GCA TCC TGT CCT TGC    |
|                             | reverse | AAA GAA ATC ATG AAC ACC GCT TA |

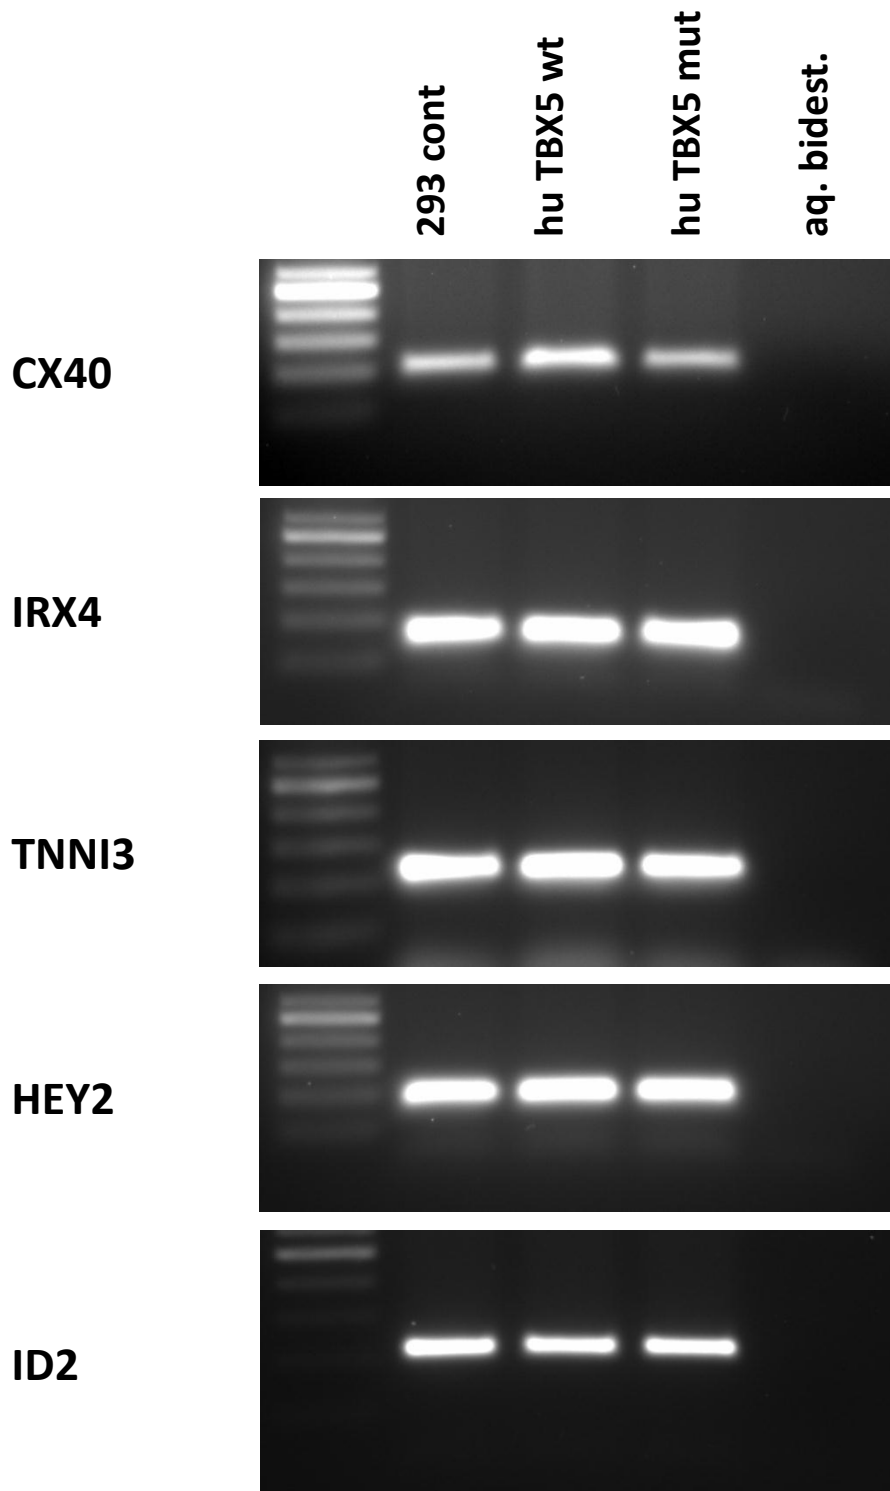

**Figure S1. Effect of wild-type and p.Pro85Thr mutation on the expression of potential down-stream targets.** HEK 293 were transfected with wild-type or mutant *TBX5* sequences and gene expression was analyzed by RT-PCR.

**Table S2. qPCR analysis of relative expression of *TBX5* downstream targets in HEK293 cells**

| <b>Gene</b> | <b>TBX5 wt</b> | <b>TBX5 mut</b> |
|-------------|----------------|-----------------|
| CX40        | 0.88 ± 0.34*   | 0.71 ± 0.05     |
| IRX4        | 0.76 ± 0.19    | 1.24 ± 0.12     |
| TNNI3       | 1.24 ± 0.03    | 1.14 ± 0.09     |
| HEY2        | 1.42 ± 0.07    | 1.32 ± 0.02     |
| ID2         | 0.93 ± 0.26    | 0.95 ± 0.03     |

\*: Values represent fold gene expression in HEK293 cells after transfection with wild-type (TBX5 wt) or p.Pro85Thr (TBX5 mut) sequences after normalization to an internal control (*β-ACTIN*). The endogenous gene expression of untransfected HEK293 cells was arbitrarily set to 1.
